# Supplementary material for: 3D Spheroid Human Dermal Papilla Cell as an Effective Model for the Screening of Hair Growth Promoting Compounds: Examples of Minoxidil and 3,4,5-Tri-O-caffeoylquinic acid (TCQA)
Source: Cells. 2022 Jun 30;11(13):2093. doi: 10.3390/cells11132093 (PMC9265566; doi:10.3390/cells11132093)
Supplement: Supplementary file 1 [file cells-11-02093-s001.zip › Supp Tables.pdf]

Supp Table S1: Top upregulated genes in 2D minoxidil-treated cells (vs 2D control) \*.

| <b>Gene symbol</b> | <b>Gene name</b>                                   | <b>Biological function</b>                                                                                                         | <b>Fold-change</b> | <b>P value **</b> |
|--------------------|----------------------------------------------------|------------------------------------------------------------------------------------------------------------------------------------|--------------------|-------------------|
| <i>CTNNB1</i>      | Catenin (cadherin associated protein), beta 1      | Anagen phase regulation; hair follicle morphogenesis; positive regulation of fibroblast growth, dermal papilla cells proliferation | 11.06              | 0.049             |
| <i>COL5A</i>       | Collagen, type V, alpha                            | Fibrillogenesis in the skin and the hair follicle                                                                                  | 8.54               | 0.011             |
| <i>FGF7</i>        | Fibroblast growth factor 7                         | Hair follicle morphogenesis; hair growth cycle regulation                                                                          | 6.16               | 0.022             |
| <i>STAT1</i>       | Signal transducer and activator of transcription 1 | Anagen onset; hair growth regulation                                                                                               | 4.83               | 0.023             |
| <i>BMP1</i>        | Bone morphogenetic protein                         | Skin development; hair follicle growth                                                                                             | 4.59               | 0.018             |
| <i>BMPER</i>       | BMP binding endothelial regulator                  | Hair follicle development and morphogenesis                                                                                        | 3.11               | 0.001             |
| <i>FSTL1</i>       | Follistatin-like 1                                 | Hair wave propagation                                                                                                              | 3.03               | 0.012             |
| <i>WLS</i>         | Wntless                                            | Wnt pathway                                                                                                                        | 2.92               | 0.016             |
| <i>FGF5</i>        | Fibroblast growth factor 5                         | Hair follicle morphogenesis ; hair growth cycle regulation                                                                         | 2.06               | 0.010             |
| <i>ALPL</i>        | Alkaline phosphatase                               | Dermal papilla marker                                                                                                              | 2.03               | 0.058             |

Supp Table S2: Top downregulated genes in 2D minoxidil-treated cells (vs 2D control) \*.

| <b>Gene symbol</b> | <b>Gene name</b>                   | <b>Biological function</b>                                    | <b>Fold-change</b> | <b>P value **</b> |
|--------------------|------------------------------------|---------------------------------------------------------------|--------------------|-------------------|
| <i>MMP24</i>       | Matrix metalloproteinase 24        | Collagen breakdown; hair follicle and skin aging              | -7.52              | 0.040             |
| <i>Defb8</i>       | Defensin, beta 8                   | Upregulation during telogen phase; absent during anagen phase | -6.6               | 0.032             |
| <i>MMP7</i>        | Matrix metalloproteinase 7         | Collagen breakdown; hair follicle and skin aging              | -6.47              | 0.001             |
| <i>STK24</i>       | Serine/threonine-protein kinase 24 | Promotion of tumor progression                                | -5.72              | 0.032             |
| <i>HYAL1</i>       | Hyaluronidase-1                    | Tumor progression                                             | -5.24              | 0.017             |
| <i>METTL21B</i>    | EEF1A lysine methyltransferase 3   | Oxidative stress induction                                    | -4.74              | 0.007             |
| <i>NELL2</i>       | Protein kinase C-binding protein   | MAPK pathway modulation                                       | -4.28              | 0.012             |
| <i>TAX1BP3</i>     | Tax1-binding protein 3             | Wnt/ $\beta$ -Catenin repression                              | -4.22              | 0.042             |
| <i>WNK2</i>        | Serine/threonine-protein kinase    | Negative regulation of MAPK pathway                           | -4.13              | 0.008             |
| <i>MMP8</i>        | Matrix metalloproteinase 8         | Collagen and filament degradation                             | -4.08              | 0.045             |

Supp Table S3: Top DEGs in 2D culture (TCQA vs Control) \*.

| <b>Gene symbol</b> | <b>Gene name</b>                           | <b>Biological function</b>                                           | <b>Fold-change</b> |
|--------------------|--------------------------------------------|----------------------------------------------------------------------|--------------------|
| <i>WNT11</i>       | Wingless-type MMTV, member 11              | Wnt pathway                                                          | 8.25               |
| <i>VCAN</i>        | Versican                                   | Cell aggregation marker, Cell adhesion and proliferation             | 4.61               |
| <i>FGF5</i>        | Fibroblast growth factor 5                 | Hair follicle morphogenesis; hair growth cycle regulation            | 3.98               |
| <i>COL3A1</i>      | Collagen, type III, alpha 1                | Fibrillogenesis in the skin and the hair follicle                    | 3.40               |
| <i>SOX4</i>        | SRY (sex determining region Y)-box 4       | Hair regeneration                                                    | 3.26               |
| <i>BMP4</i>        | Bone morphogenetic protein 4               | Control hair follicle growth and development                         | 2.47               |
| <i>Aebp1</i>       | AE binding protein 1                       | Regulator of telogen hair follicle                                   | -2.46              |
| <i>Satb1</i>       | Special AT-rich sequence binding protein 1 | Regulator of transcription during telogen                            | -2.02              |
| <i>Egr1</i>        | Early growth response 1                    | Negative regulation of Wnt/ $\beta$ -Catenin; upregulated with aging | -1.7               |
| <i>AXIN2</i>       | Axis inhibition protein 2                  | Wnt-responsive gene                                                  | -1.5               |
| <i>Gsk3b</i>       | Glycogen synthase kinase 3 beta            | Phosphorylation of $\beta$ -catenin                                  | -1.5               |

Supp Table S4: Top upregulated hair growth-related genes 3D culture (TCQA vs Control) \*.

| <b>Gene symbol</b> | <b>Gene name</b>                              | <b>Biological function</b>                                                                                                         | <b>Fold-change</b> |
|--------------------|-----------------------------------------------|------------------------------------------------------------------------------------------------------------------------------------|--------------------|
| <i>BMPR-1A</i>     | Bone morphogenetic protein                    | Skin development; hair follicle growth                                                                                             | 64.89              |
| <i>CTNNB1</i>      | Catenin (cadherin associated protein), beta 1 | Anagen phase regulation; hair follicle morphogenesis; positive regulation of fibroblast growth, dermal papilla cells proliferation | 43.57              |
| <i>WNT11</i>       | Wingless-type MMTV, member 11                 | Wnt pathway                                                                                                                        | 40.98              |
| <i>COL3A1</i>      | Collagen, type III, alpha 1                   | Fibrillogenesis in the skin and the hair follicle                                                                                  | 28.23              |
| <i>FGF1</i>        | Fibroblast growth factor 1                    | Hair follicle morphogenesis; hair growth cycle regulation                                                                          | 26.45              |
| <i>FGF5</i>        | Fibroblast growth factor 5                    | Hair follicle morphogenesis; hair growth cycle regulation                                                                          | 23.61              |
| <i>WLS</i>         | Wntless                                       | Wnt secretion and pathway                                                                                                          | 16.38              |
| <i>NRAS</i>        | Neuroblastoma RAS viral oncogene homolog      | Cell proliferation                                                                                                                 | 16                 |
| <i>SOX4</i>        | SRY (sex determining region Y)-box 4          | Hair regeneration                                                                                                                  | 13.92              |
| <i>VCAN</i>        | Versican                                      | Cell aggregation marker, Cell adhesion and proliferation                                                                           | 12.21              |
| <i>ALPL</i>        | Alkaline phosphatase                          | Wnt/ $\beta$ -catenin pathway regulator                                                                                            | 8                  |
| <i>BMP4</i>        | Bone morphogenetic protein 4                  | Control hair follicle growth and development                                                                                       | 2.47               |

Supp Table S5: Top downregulated hair growth-related genes 3D culture (TCQA vs Control) \*.

| <b>Gene symbol</b> | <b>Gene name</b>                                                          | <b>Biological function</b>                                           | <b>Fold-change</b> |
|--------------------|---------------------------------------------------------------------------|----------------------------------------------------------------------|--------------------|
| <i>Gsk3b</i>       | Glycogen synthase kinase 3 beta                                           | Phosphorylation of $\beta$ -catenin                                  | -6                 |
| <i>Tcf3</i>        | Transcription factor 3                                                    | Wnt/ $\beta$ -Catenin repression                                     | -5                 |
| <i>AXIN2</i>       | Axis inhibition protein 2                                                 | Wnt-responsive gene                                                  | -5                 |
| <i>Nfatc1</i>      | Nuclear factor of activated T cells, cytoplasmic, calcineurin dependent 1 | Stem cells quiescence                                                | -4.9               |
| <i>Egr1</i>        | Early growth response 1                                                   | Negative regulation of Wnt/ $\beta$ -Catenin; upregulated with aging | -4                 |
| <i>Dst</i>         | Dystonin                                                                  | Cell cycle arrest                                                    | -3                 |
| <i>H2afv</i>       | H2A histone family                                                        | Stem cell quiescence, Anagen delay                                   | -3                 |
| <i>Shisa3</i>      | Shisa family member 3                                                     | Negative regulator of Wnt/ $\beta$ -Catenin                          | -2.9               |
| <i>LDB3</i>        | LIM Domain Binding 3                                                      | Wnt-responsive gene; Regulation of hair follicle during telogen      | -2.7               |

For all Tables

\*Genes functions were obtained from Mouse Genome Informatics (MGI) and Gene Set Enrichment Analysis (GSEA)

\*\*ANOVA was performed to assess the level of significance between groups. The gene expression was considered significant when fold change was  $\geq 2$ -fold (control vs TCQA
